# Supplementary material for: Accuracy of Cardiac Output by Nine Different Pulse Contour Algorithms in Cardiac Surgery Patients: A Comparison with Transpulmonary Thermodilution
Source: Hindawi journal article supplement (doi:10.1155/2016/3468015), 2016-01-01
Supplement: f1 [file 3468015.f1.docx]

**Supplemental material**

**Supplement A:** Correlation coefficients between percentage changes in cardiac output by transpulmonary thermodilution (∆COTPTD) and by nine different pulse contour algorithms (∆COX1-9). ∆CO represent the changes in CO between sequential readings per time. ModifiedBland-Altman analysis showing bias, standard deviation of bias (SD of bias) and 95% limits of agreement before (T1) and after cardiopulmonary bypass (T2).

| **Supplement A:** Correlation coefficients between percentage changes in cardiac output by transpulmonary thermodilution (∆COTPTD) and by nine different pulse contour algorithms (∆COX1-9). ∆CO represent the changes in CO between sequential readings per time. ModifiedBland-Altman analysis showing bias, standard deviation of bias (SD of bias) and 95% limits of agreement before (T1) and after cardiopulmonary bypass (T2). | | | | | | | | | | | | | | | | | | | | | | | |
| --- | --- | --- | --- | --- | --- | --- | --- | --- | --- | --- | --- | --- | --- | --- | --- | --- | --- | --- | --- | --- | --- | --- | --- |
|  |  |  |  |  | |  | |  | |  | |  |  |  |  | | |  | | |  | | |
|  |  |  |  | **pre CPB (T1)** | | | | | | | |  |  |  | **post CPB (T2)** | | | | | | | | |
|  | **X1** | **X2** | **X3** | **X4** | **X5** | | **X6** | | **X7** | | **X8** | **X9** | **X1** | **X2** | **X3** | **X4** | **X5** | | **X6** | **X7** | | **X8** | **X9** |
| **Correlation (r²)** | 0.34 | 0.53 | 0.49 | 0.52 | 0.53 | | 0.56 | | 0.45 | | 0.38 | 0.44 | 0.16 | 0.41 | 0.38 | 0.46 | 0.37 | | 0.19 | 0.11 | | 0.10 | 0.13 |
| **Bias (%)** | -6 | -1 | -3 | -2 | 1 | | 2 | | -3 | | -3 | -2 | 9 | 2 | 3 | -3 | 3 | | 8 | 7 | | 8 | 7 |
| **SD of bias (%)** | 27 | 25 | 27 | 25 | 26 | | 27 | | 27 | | 27 | 26 | 32 | 22 | 24 | 21 | 23 | | 31 | 30 | | 31 | 29 |
| **95% limits of agreement (%)** | -61  -  +28 | -51  -  +49 | -52  -  +53 | -51  -  +48 | -50  -  +52 | | -50  -  +54 | | -56  -  +50 | | -57  -  +51 | -53  -  +49 | -53  -  +71 | -42  -  +46 | -45  -  +50 | -43  -  +37 | -43  -  +49 | | -53  -  +70 | -53  -  +65 | | -52  -  +67 | -49  -  +63 |

CPB, cardiopulmonary bypass; COX1-9, cardiac output by nine different pulse contour algorithms; ∆CO, percentage changes in cardiac output.
